# Supplementary material for: Evaluation of phosphorus, calcium, and magnesium content in commercially available foods formulated for healthy cats
Source: PubMed Central journal article supplement — J Vet Intern Med. 2019 Dec 28;34(1):266–73. doi: 10.1111/jvim.15689 (PMC6979088; doi:10.1111/jvim.15689), 2019-12-28
Supplement: JVIM-34-266-s001.pdf [file JVIM-34-266-s001.pdf]

## Study Adult Cat Food Products

### Canned Food:

1. 9Lives Protein Plus with Tuna and Chicken Cat Food, Big Heart Pet Brands, San Francisco, CA
2. Authority Chicken Entrée in Gravy Flaked Adult Cat Food, PetSmart, Phoenix, AZ
3. Blue Wilderness Duck Recipe, General Mills, Minneapolis, MN
4. Canidae Grain Free PURE Elements Chicken, Turkey, & Lamb Wet Formula for Cats, Canidae Pet Food Corporation, San Luis Obispo, CA
5. Organix Grain Free Organic Turkey Recipe Cat Food, Nestle Purina PetCare, St. Louis, MO
6. Crave Salmon Pate Tender Cat Food, Mars Petcare, Franklin, TN
7. Fancy Feast Classic Pate Tender Beef Feast, Nestle Purina PetCare, St. Louis, MO
8. Four-Star Nutritionals Chicken & Salmon Pate Food for Cats, Fromm Family Foods LLC, Mequon, WI
9. The Hounds & Gatos Lamb & Lamb Liver for Cats, Gott Pet Products, St. Francis, WI
10. Instinct Original Real Duck Recipe, Nature's Variety, St. Louis, MO
11. Instinct Original Real Rabbit Recipe, Nature's Variety, St. Louis, MO
12. Instinct Original Real Venison Recipe, Nature's Variety, St. Louis, MO
13. Instinct Original Real Beef Recipe, Nature's Variety, St. Louis, MO
14. Kasiks Cage-Free Turkey Formula, FirstMate, British Columbia, Canada
15. Merrick Purrfect Bistro Duck Pate Cat Food, Nestle Purina PetCare, St. Louis, MO
16. My Little Lion Duck Recipe, American Pet Nutrition, Ogden, UT
17. Dick Van Patten's Natural Balance L.I.D. Limited Ingredient Diets Salmon & Green Pea Formula Cat Food, Dick Van Patten's Natural Balance Pet Foods, Los Angeles, CA
18. Dick Van Patten's Natural Balance L.I.D. Limited Ingredient Diets Venison and Green Pea Formula Adult Cat Food, Dick Van Patten's Natural Balance Pet Foods, Los Angeles, CA
19. Nulo Freestyle Salmon & Mackerel Recipe Cat & Kitten, Simmons Pet Foods, Siloam Springs, AR
20. Nutro Max Cat Salmon Entrée Chunks in Sauce Cat Food, Mars PetCare, Franklin, TN
21. Open Farm Grass-Fed Beef Rustic Blend cat food, Pilgrim's Pride Corporation, Greeley, CO
22. Friskies Pate Mariner's Catch, Nestle Purina PetCare, St. Louis, MO
23. Pro Plan Beef & Carrots Entrée Grain Free Classic, Nestle Purina PetCare, St. Louis, MO
24. Pro Plan Adult Chicken & Rice Entrée in Gravy, Nestle Purina PetCare, St. Louis, MO
25. Pro Plan Adult Turkey & Rice Entrée in Gravy, Nestle Purina PetCare, St. Louis, MO
26. Sheba Pate Tender Beef Entrée, Mars PetCare, Franklin, TN
27. Simply Nourish Source Adult Duck Recipe Cat Food, American Nutrition, Ogden, UT
28. Wellness Pate Beef & Chicken Dinner Cat Food, WellPet LLC, Tewksbury, MA
29. Wellness Core Signature Selects Flaked Shipjack Tuna & Shrimp Entrée in Broth, WellPet LLC, Tewksbury, MA
30. Cats in the Kitchen Two Tu Tango, Sardine, Tuna, and Turkey Recipe Au Jus Songkla Canning Company, Bangkok, Thailand

**Dry Food:**

1. Purina Friskies Seafood Sensations, Nestle Purina PetCare, St. Louis, MO
2. Nulo Medal Series Turkey & Chicken Recipe Indoor Adult Cat Food, Simmons Pet Foods, Siloam Springs, AR
3. Twin Pet Complete Formula Adult Cat Food, Simmons Pet Food, Siloam Springs, AR
4. Purina Cat Chow Indoor, Nestle Purina PetCare, St. Louis, MO
5. Purina Pro Plan Focus Adult Indoor Care Turkey & Rice Formula, Nestle Purina PetCare, St. Louis, MO
6. Purina One Indoor Advantage, Nestle Purina PetCare, St. Louis, MO
7. BLUE Chicken and Brown Rice Recipe for Indoor Adult Cats, General Mills, Minneapolis, MN
8. Merrick Purrfect Bistro Real Salmon Recipe, Nestle Purina PetCare, St. Louis, MO
9. Iams Healthy Adult with salmon & tuna cat food, Mars, McLean, VA
10. Wellness CORE Indoor Debones Chicken, Turkey, and Chicken Meals Recipe Cat Food, WellPet LLC, Tewksbury, MA
11. Purina Fancy Feast with Savory Chicken & Turkey, Nestle Purina PetCare, St. Louis, MO
12. Organix Organic Chicken & Brown Rice Recipe Cat Food, Nestle Purina PetCare, St. Louis, MO
13. Authority Chicken & Rice Formula Indoor Cat Food, PetSmart, Phoenix, AZ
14. Halo Adult Cat Holistic Chicken & Chicken Liver, Halo Pets, Tampa, FL
15. Nutro Wholesome Essentials Adult Salmon & Brown Rice Recipe Cat Food, Mars PetCare, Franklin, TN
16. Science Diet Adult Sensitive Stomach & Skin cat food, Hill's Pet Nutrition Inc, Topeka, KS
17. Canidae All Life Stages Formula for Cats, Canidae Pet Food Corporation, San Luis Obispo, CA
18. Fromm Four-Star Nutritionals Beef Liva'ttini Veg Recipe Food for Cats, Fromm Family Foods LLC, Mequon, WI
19. Acana Grasslands, Champion Petfoods, Auburn, KY
20. Fussie Cat Market Fresh Quail & Duck Meal Recipe for cats, Pets Global Inc, Valencia, CA
21. Elevate Glacier Bay Recipe Cat Food, American Pet Nutrition, Ogden, UT
22. Earthborn Holistic Primitive Feline, Midwestern Pet Foods Inc, Evansville, IN
23. NutriSource Cat & Kitten Chicken & Rice Formula, KLN Family Brands, Perham, MI
24. Orijen Six Fish, Champion Petfoods, Auburn, KY
25. Dick Van Patten's Natural Balance L.I.D. Limited Ingredient Diets Green Pea & Duck Formula, Dick Van Patten's Natural Balance Pet Foods, Los Angeles, CA
26. Taste of the Wild Prey Angus Beef Formula for Cats, Diamond Pet Foods, Meta, MO
27. PureVita Salmon and Peas Entrée Grain Free Cat Food, KLN Family Brands, Perham, MI
28. PureVita Duck & Red Lentils Entrée Grain Free Cat Food, KLN Family Brands, Perham, MI
29. Dick Van Patten's Natural Balance L.I.D. Limited Ingredient Diets High Protein Tuna Formula Adult Cat Food, Dick Van Patten's Natural Balance Pet Foods, Los Angeles, CA

30. Open Farm Pasture-Raised Lamb Recipe Cat Food, Pilgrim's Pride Corporation, Greeley, CO

**Raw Foods:**

1. Instinct Raw Boost Grain-Free Recipe with Real Rabbit for Indoor Health, Nature's Variety, St. Louis, MO
2. Primal Pet Foods Raw Freeze-Dried Feline Beef & Salmon Formula, Primal Pet Foods, Fairfield, CA
3. Primal Pet Foods Raw Freeze-Dried Feline Pork Formula, Primal Pet Foods, Fairfield, CA
4. Primal Pet Foods Raw Freeze-Dried Feline Quail Formula, Primal Pet Foods, Fairfield, CA
5. Primal Pet Foods Raw Freeze-Dried Feline Rabbit Formula, Primal Pet Foods, Fairfield, CA
6. Primal Pet Foods Raw Freeze-Dried Feline Turkey Formula, Primal Pet Foods, Fairfield, CA
7. Primal Pet Foods Raw Frozen Feline Beef & Salmon Formula, Primal Pet Foods, Fairfield, CA
8. Primal Pet Foods Raw Frozen Feline Duck Formula, Primal Pet Foods, Fairfield, CA
9. Primal Pet Foods Raw Frozen Feline Pork Formula, Primal Pet Foods, Fairfield, CA
10. Primal Pet Foods Raw Frozen Feline Quail Formula, Primal Pet Foods, Fairfield, CA
11. Primal Pet Foods Raw Frozen Feline Turkey Formula, Primal Pet Foods, Fairfield, CA
12. Absolutely Rabbit Dinner Morsels, Stella & Chewy's, Oak Creek, WI
13. Chick Chick Chicken Dinner Morsels, Stella & Chewy's, Oak Creek, WI
14. Beefbatch Sliders, Small Batch Pet Food, San Francisco, CA
15. Duckbatch Sliders, Small Batch Pet Food, San Francisco, CA
16. Rabbitbatch Sliders, Small Batch Pet Food, San Francisco, CA
17. Turkeybatch Cat Sliders, Small Batch Pet Food, San Francisco, CA
18. Wellness CORE RawRev Original Deboned Turkey, Turkey Meal & Chicken Meal Recipe Cat Food, WellPet LLC, Tewksbury, MA
19. Ziwi Peak Beef Recipe, Ziwi Pets, Overland Park, KS
20. Ziwi Peak Lamb Recipe, Ziwi Pets, Overland Park, KS
21. Ziwi Peak Mackerel and Lamb Recipe, Overland Park, KS
22. Ziwi Peak Venison Recipe, Ziwi Pets, Overland Park, KS
